# Supplementary material for: Serum docosahexaenoic acid as a predictor of hospital readmission in chronic obstructive pulmonary disease exacerbation: a retrospective cohort study
Source: PeerJ journal article supplement (doi:10.7717/peerj.20865), 2026-02-19
Supplement: data.zip [file Supplementary Data 1.xlsx]

## Sheet: Sheet1
	inclusion	Readmission due to AE	months	FA(22:6)	FA(20:4)	FA(18:3)	FA(20:5)	FA(18:2)
1	2016-12-27	0	64	1.53764e-05	1.21954e-05	0.00184307	8.45082e-05	3.46556e-05
2	2016-06-06	1	1	1.63476e-05	1.37876e-05	0.000364452	3.91658e-05	3.62031e-05
3	2016-12-26	0	64	1.72755e-05	1.95746e-05	0.000526538	2.00653e-05	2.62219e-05
4	2016-04-20	1	14	1.94306e-05	6.61752e-06	0.000944226	6.79272e-05	3.31164e-05
5	2017-02-28	0	62	2.13894e-05	2.1173e-05	0.000274206	9.25835e-05	3.44922e-05
6	2017-04-11	1	6	2.21049e-05	2.19092e-05	0.000350412	3.02084e-05	3.55618e-05
7	2017-04-05	0	60	2.21607e-05	2.83131e-05	0.000216928	5.65341e-05	4.13264e-05
8	2017-03-23	1	14	2.3009e-05	1.48406e-05	0.0010273	4.74589e-05	4.37027e-05
9	2016-07-29	1	17	2.45024e-05	1.88954e-05	0.000939386	7.94566e-05	3.373e-05
10	2017-02-14	1	1	2.53513e-05	7.819e-06	0.000658193	2.68755e-05	3.9629e-05
11	2018-02-06	0	50	2.53747e-05	1.34128e-05	0.000950527	8.05411e-05	5.25912e-05
12	2016-04-25	1	6	2.55179e-05	9.89043e-06	0.000979984	6.94295e-05	3.52369e-05
13	2018-01-09	1	29	2.63645e-05	1.99178e-05	0.000617173	5.64587e-05	3.44458e-05
14	2017-03-08	1	10	2.6368e-05	2.13177e-05	0.000629667	7.10941e-05	3.17449e-05
15	2017-02-09	0	62	2.74247e-05	1.28461e-05	0.000260026	0.000132845	2.69273e-05
16	2017-10-27	1	23	2.77126e-05	9.83799e-06	0.000703512	0.000152799	2.63369e-05
17	2017-09-01	0	55	2.87435e-05	8.72218e-06	0.000540396	8.13212e-05	2.58717e-05
18	2016-05-30	1	24	2.89267e-05	1.63872e-05	0.000677257	6.99839e-05	2.74273e-05
19	2017-03-21	0	61	2.98036e-05	3.2743e-05	0.000466894	4.79309e-05	3.72488e-05
20	2016-04-28	0	72	3.11509e-05	1.05901e-05	0.000205786	9.85658e-05	3.5514e-05
21	2016-12-30	0	64	3.18139e-05	1.71488e-05	0.00132588	0.000106674	3.01679e-05
22	2017-04-10	1	10	3.19641e-05	5.64752e-06	0.00119469	5.78741e-05	3.5847e-05
23	2018-01-18	1	10	3.27034e-05	3.5975e-05	0.000435468	2.13693e-05	4.34817e-05
24	2016-04-06	0	72	3.33343e-05	3.24828e-05	0.000238102	6.24974e-05	5.92514e-05
25	2017-02-04	1	15	3.36178e-05	2.14972e-05	0.000900408	5.88607e-05	4.32346e-05
26	2017-02-05	0	62	3.4534e-05	9.90567e-06	0.000397809	3.26363e-05	3.71858e-05
27	2017-02-16	1	16	3.45666e-05	1.32889e-05	0.00068198	0.000112375	2.57317e-05
28	2017-10-19	1	2	3.51295e-05	1.92149e-05	0.000839523	9.59007e-05	4.31236e-05
29	2017-09-14	0	55	3.55414e-05	9.94196e-06	0.000742548	4.03653e-05	3.7858e-05
30	2017-08-24	0	56	3.57978e-05	2.04766e-05	0.0015668	7.39353e-05	3.66958e-05
31	2016-03-02	1	1	3.68122e-05	2.5012e-05	0.000705395	4.89229e-05	3.4139e-05
32	2017-03-25	1	23	3.6955e-05	1.12161e-05	0.000643313	0.000288595	3.79884e-05
33	2016-05-11	1	11	3.75171e-05	1.12376e-05	0.000714711	7.21698e-05	3.79952e-05
34	2016-07-26	1	17	3.77804e-05	1.18674e-05	0.000495992	4.42096e-05	4.50523e-05
35	2016-06-20	1	2	3.79916e-05	1.50957e-05	0.00056919	3.61469e-05	4.79592e-05
36	2017-02-22	0	62	3.87582e-05	1.79712e-05	0.000625876	0.000114099	3.59874e-05
37	2016-04-22	0	72	3.88328e-05	3.92146e-05	0.000209778	7.35374e-05	2.91729e-05
38	2017-03-11	0	61	3.91615e-05	7.76657e-06	0.000310601	2.73613e-05	3.13392e-05
39	2017-02-14	1	11	3.93836e-05	2.35386e-05	0.000533759	3.70822e-05	4.58499e-05
40	2016-04-15	0	72	3.94812e-05	1.28077e-05	0.000228664	0.0001657	5.00729e-05
41	2017-02-16	0	62	3.98452e-05	1.70436e-05	0.000407298	0.000176459	3.36436e-05
42	2018-01-19	0	51	4.04505e-05	3.21342e-05	0.000600788	5.0553e-05	4.84083e-05
43	2018-01-30	0	51	4.09129e-05	1.80756e-05	0.00128869	0.000125969	4.1248e-05
44	2016-05-24	1	5	4.09572e-05	2.22704e-05	0.00132125	0.000132279	3.02306e-05
45	2016-12-26	0	64	4.09741e-05	1.53715e-05	0.000922573	3.94797e-05	3.71241e-05
46	2017-01-26	1	11	4.11876e-05	1.67541e-05	0.0017645	8.65662e-05	3.64965e-05
47	2017-01-26	0	63	4.11933e-05	3.56432e-05	0.00114219	0.000115105	3.93675e-05
48	2016-04-13	0	72	4.14125e-05	2.19393e-05	0.000277322	5.31622e-05	3.9639e-05
49	2016-11-30	0	65	4.1525e-05	1.40759e-05	0.000424286	5.18755e-05	1.78567e-05
50	2016-04-13	0	72	4.2587e-05	5.94491e-05	0.000768404	0.000100246	3.58774e-05
51	2017-12-28	0	52	4.36449e-05	2.92816e-05	0.000606722	7.08477e-05	3.57999e-05
52	2016-06-16	1	14	4.43258e-05	3.75515e-05	0.000606427	5.48154e-05	4.70429e-05
53	2017-02-05	0	62	4.47042e-05	2.53608e-05	0.000972441	4.77234e-05	3.92945e-05
54	2017-02-07	1	21	4.47462e-05	2.26278e-05	0.000587643	6.23325e-05	3.00755e-05
55	2017-11-23	1	1	4.64896e-05	2.70885e-05	0.000715558	0.000118334	3.50165e-05
56	2018-03-22	0	49	4.68634e-05	1.81981e-05	0.000826061	8.91702e-05	4.31326e-05
57	2017-01-24	0	63	4.73087e-05	1.77818e-05	0.00112035	8.16145e-05	4.01598e-05
58	2016-03-28	0	73	4.73742e-05	3.37013e-05	0.000999022	7.66517e-05	4.63968e-05
59	2017-01-05	0	63	4.78638e-05	2.10585e-05	0.000730589	7.10451e-05	4.00828e-05
60	2016-07-29	0	69	4.8167e-05	1.77862e-05	0.000186537	5.81804e-05	3.28899e-05
61	2016-05-17	0	71	4.83674e-05	2.91548e-05	0.00032267	6.73879e-05	3.74535e-05
62	2017-01-04	1	16	4.89784e-05	3.54885e-05	0.00140633	0.000161361	3.9525e-05
63	2017-03-07	0	61	4.9323e-05	4.13962e-05	0.00137796	0.000165327	4.64298e-05
64	2016-12-08	0	64	5.05526e-05	2.13203e-05	0.000639382	6.0082e-05	3.08829e-05
65	2017-01-09	0	63	5.07962e-05	9.11382e-06	0.00119754	5.75976e-05	4.60523e-05
66	2016-12-08	1	16	5.11616e-05	1.69146e-05	0.000657718	7.32585e-05	4.31007e-05
67	2016-04-13	1	67	5.19085e-05	2.94618e-05	0.00109939	0.000121231	6.33608e-05
68	2017-12-13	0	52	5.45468e-05	2.25685e-05	0.00137619	0.000132453	3.64463e-05
69	2017-02-17	0	62	5.61835e-05	1.76798e-05	0.000582909	7.3096e-05	2.48626e-05
70	2017-01-05	0	63	5.64467e-05	1.81317e-05	0.000844653	0.000140112	4.90216e-05
71	2016-12-29	0	64	5.66703e-05	1.22067e-05	0.00152296	0.00010361	4.10816e-05
72	2017-08-25	1	18	5.71821e-05	2.20561e-05	0.000422571	5.07804e-05	3.76987e-05
73	2018-01-24	1	4	5.77204e-05	3.54113e-05	0.000286944	6.23367e-05	3.87527e-05
74	2017-01-19	1	7	6.14749e-05	2.06941e-05	0.000684963	3.39689e-05	4.99866e-05
75	2017-08-30	0	56	6.21259e-05	1.7747e-05	0.00123551	6.27273e-05	3.71836e-05
76	2017-03-18	0	61	6.26396e-05	2.18661e-05	0.00211311	0.000149001	5.21145e-05
77	2017-02-09	1	34	7.07798e-05	5.88038e-05	0.00149486	8.72461e-05	3.20853e-05
78	2017-08-29	0	56	7.23452e-05	2.51222e-05	0.00114159	8.50862e-05	3.77589e-05
79	2018-01-10	0	51	7.40139e-05	3.93959e-05	0.000889391	8.22904e-05	4.26932e-05
80	2016-06-06	0	70	7.45359e-05	3.84265e-05	0.00087143	0.000109364	4.93389e-05
81	2016-04-20	1	13	7.63213e-05	1.81486e-05	0.000960119	0.000104949	5.13783e-05
82	2017-01-16	1	16	7.76681e-05	3.30132e-05	0.000639063	9.58286e-05	5.20996e-05
83	2018-01-10	0	51	8.37791e-05	4.26819e-05	0.000802776	7.4088e-05	6.85419e-05
84	2017-08-03	0	56	8.4513e-05	2.5417e-05	0.000802479	0.00019872	3.70735e-05
85	2017-01-09	0	63	9.48382e-05	2.51083e-05	0.00122503	0.000104711	4.0519e-05
86	2018-01-05	0	51	0.000105448	2.23985e-05	0.00161154	0.000119629	3.91892e-05
87	2017-09-16	0	55	0.00011707	1.58653e-05	0.000960089	0.000103744	2.87976e-05
88	2017-01-07	0	63	0.000134722	2.78331e-05	0.00111157	7.65031e-05	4.13649e-05
