# Supplementary material for: Serum docosahexaenoic acid as a predictor of hospital readmission in chronic obstructive pulmonary disease exacerbation: a retrospective cohort study
Source: PeerJ journal article supplement (doi:10.7717/peerj.20865), 2026-02-19
Supplement: data.zip [file Supplementary Data 2.xlsx]

## Sheet: Sheet1
ID	inclusion	sex	age	height	weight	BMI	smokingindex	packyear	Number of AE hospitalizations in the past year	Length of COPD disease (years)	respiratory failure	PH	PCO2	PO2	hypertension	Coronary heart disease	heart failure	Arrhythmias	Peripheral vascular disease	diabetes	Hyperlipidemia	lung cancer	osteoporosis	FEV1FVC	FEV1%predicted	Absolute blood eosinophil count	Blood eosinophil percentage	CRP	D-dimer	Fibrinogen	PCT	BNP
P28	2016-05-13	1	61	170	71	24.5675	40*20	40	0	8	0	7.37	41	69	0	0	0	0	0	0	0	0	0	50.01	28.6	0.38	4.9		0.05	0.95	0.04	27.31
P75	2017-02-22	1	75	172	84	28.4	10*5	2.5	0	8	0	7.41	40	71.9	1	1	0	0	0	0	1	0	0	63	43	0.7	10.8	1.31	0.18	4.81	0.03	241.1
P13	2016-04-06	1	57	180	72	21.9136	40*15	30	0	0.083	0	7.41	41.1	81.3	0	0	0	0	0	0	0	0	0	45.95	43.3	0.3	3.5	0.3	0.13	2.97	0.03
P15	2016-04-13	0	85	151	51	22.3674	40*10	20	0	20	1	7.44	41.6	59.3	0	0	0	0	0	0	0	0	0	63	38	0	0.1	18.9	0.25	5.8	0.22	315.8
P16	2016-04-13	0	75	155	40	16.6493	20*20	20	0	3	1	7.49	46.7	53.4	0	0	0	0	0	0	0	0	0	64	60	0.1	0.7	3.51	0.38	4.29	0.11
P17	2016-04-13	1	78	173	80	26.7299	40*10	20	0	20	0	7.397	39.1	79.4	1	1	0	1	0	1	1	0	0	56	48	0.01	0.1		0.21		0.5	127.4
P20	2016-04-15	1	73	162	64	24.3865	50*20	50	3	8	0	7.42	40.2	74.8	0	0	0	0	0	0	0	0	0	63	76	0.19	2.5		0.35	3.09	0.03	35.21
P22	2016-03-28	1	66	175	75	24.4898	30*40	60	1	20					1	0	0	0	0	0	0	0	0			0.05	0.8	0.26	0.04	3.04	0.03
P23	2016-04-20	1	80	173	51	17.0403	30*15	45	2	18	1	7.52	31.8	52.1	1	0	0	0	1	0	0	0	0			0.01	0.1	6.29	0.45	4.13	0.09	535.9
P24	2016-04-20	1	85	165	46	16.8962	50*20	50	0	2	0	7.45	41.3	81.2	0	0	0	0	1	0	0	0	0			0.1	3.3		0.29	4.98	0.29	382.1
P25	2016-04-25	1	86	159	62	24.5243	60*20	60	0	0.08	0	7.41	34.8	86.7	1	0	0	0	0	0	1	0	0			0.51	5.5		0.32	2.81	0.02	223.7
P26	2016-04-22	1	58	165	57	20.9366	40*40	80	1	2	1	7.45	43.7	58.1	0	0	0	0	0	0	0	0	0	46	41	0.08	1.5		0.14	3.25	0.03
P27	2016-04-28	1	77	167	65	23.3067	10*8	4	0	5	0	7.43	41	81.3	1	0	0	0	0	0	0	0	0	68	86	0.1	2.4		0.04	2.32		127.5
P29	2016-05-17	1	78	172	44	14.8729	0	0	1	10	0	7.45	40.8	71.5	0	0	0	0	0	0	0	0	0	44.5	27.2	0	0.1		0.27	3.59	0.05	723.4
P30	2016-03-02	1	75	170	82	28.3737	30*20	30	2	9	0	7.45	35.4	82.5	1	1	0	1	0	0	0	0	0	68	51	0	0	1.89	0.15	4.09	0.05	304.2
P31	2016-05-11	1	63	173	77	25.7276	30*20	30	1	1	0	7.42	36.2	61	1	0	0	0	1	1	0	0	0	59.6	47.4	0.04	1.4		0.09	3.02	0.23	19.54
P32	2016-05-24	1	76	164	62	23.0518	50*20	50	3	10	0	7.488	43	72	0	0	0	1	0	0	1	0	0	59	56	0.12	2.8		0.49	3.73	0.1	1958
P33	2016-05-30	1	86	173	70	23.3887	20*40	40	0	20	0	7.42	46.5	75.8	0	0	0	1	0	0	0	0	0	45	42	0	0.3		0.35	4.05	0.18	2597
P34	2016-06-06	1	69	165	85	31.2213	40*20	40	1	50	1	7.437	49.6	65.5	1	0	0	0	0	0	0	0	0	47	25	0	0		0.14	3.18		41.89
P35	2016-06-06	1	66	173	65	21.7181	50*20	50	0	15	1	7.39	54	57.5	1	0	0	0	0	0	0	0	0			0.15	2.4		0.14	4.09	0.03	49.36
P36	2016-06-15	1	75	174	65	21.4692	50*20	50	0	3	0	7.41	48.3	81.7	1	1	0	0	0	0	0	1	0	60	46	0.14	2.6		0.51	4.33		711
P37	2016-06-16	1	53	160	51	19.9219	30*20	30	0	20	1	7.35	77	48	0	0	0	0	0	0	0	0	0			0.06	0.6		0.52	2.73	0.06	272.9
P38	2016-06-20	1	84	177	55	17.5556	30*20	30	0	10	0	7.43	42.1	85.8	1	0	0	0	0	0	0	1	0			0	0		0.2	4.11	0.04
P39	2016-07-29	1	82	172	62	21	60*4	12	0	0.58					1	0	0	0	0	1	0	0	0			0.2	2.1		0.17	2.77	0.07	431.9
P40	2016-07-29	1	81	158	51	20.4	50*15	38	0	20	0	7.51	36	64.5	1	0	0	0	0	0	0	0	0	36	40	0	0	11.3	0.57	4.23	0.13	2388
P41	2016-07-26	1	71	172	65	22	40*10	20	2	20	0	7.4	31	85.7	0	0	0	0	0	0	0	0	0	42	40	0.98	9.2	1.1	0.15	3.5	0.03	15.27
P42	2016-11-30	1	57	174	83	27.4	40*40	80	0	7	0	7.44	40.7	71.8	0	0	0	0	0	0	0	0	0	51.28	35.4	0.66	6.2	7.96	6.55	3.85	0.07	59.65
P43	2016-11-30	0	90	162	34	13	50*6	12.5	0	0.05	0	7.45	33.4	75.4	0	0	0	0	0	0	0	0	1			0.13	3.5	2.03	0.4	3.96	0.06	278.7
P44	2016-12-08	0	80	162	42	16	0	0	1	40	1	7.36	94	113	0	0	1	1	0	0	0	0	0			0	0	3.12		3.02	0.33	24800
P45	2016-12-08	1	56	180	100	30.9	30*40	60	0	23	1	7.4	48.1	58.6	0	0	0	0	0	0	0	0	0	33	22	0	0	15.9	0.23	7.91	0.1	562.3
P47	2016-12-26	1	73	170	50	17.3	30*20	30	2	12	1	7.36	57	65	0	0	0	1	0	0	0	0	0	44.35	19.2	0.01	0.2	0.41	0.8	3.09	0.13	420
P48	2016-12-26	0	90	155	39	16.2	30*20	30	6	42	1	7.18	80	29	1	0	0	1	0	0	0	0	0			0	0	3.45	0.38	3.3	0.15	4694
P49	2016-12-27	1	62	158	73	29.2	30*40	60	0	0.92	0	7.43	35.3	72.1	1	0	1	0	0	0	0	0	0	66.68	89.8	0.21	3.2	0.15	0.2	2.62	0.05	2459
P50	2017-01-05	0	71	157	96	38.9	40*20	40	1	5	1	7.35	60	70	1	0	1	0	0	0	0	0	0			0.04	0.5		0.47	4.85	0.13	5120
P51	2017-01-04	1	83	165	75	27.5	0	0	0	10	1	7.49	72	52	1	0	0	0	0	0	0	0	0	35.77	24	0.09	0.9	5.53	0.15	3.42		217
P52	2017-01-07	0	82	160	55	21.5	70*40	140	0	10	0	7.43	34.8	98.7	1	1	1	1	1	0	0	0	0			0	0	0.98	0.5	3.73	0.06	3091
P53	2017-01-09	1	74	167	53.5	19.2	50*20	50	0	9	0	7.41	43.5	114.3	0	0	0	0	0	0	0	0	0	56	50	0.31	6.1	0.22	0.15	3.38	0.04
P54	2017-01-09	1	70	171	66	22.6	30*7	10	0	16	1	7.45	35	57	1	0	0	0	0	1	1	0	0	43	24	0.02	0.2	2.17	0.09	4.29	0.06	173
P55	2016-12-29	1	82	169	72	25.2	60*4	12	0	30	0	7.42	40	76	1	0	0	0	0	1	1	0	0	48	40	0.03	0.5	0.66	0.11	1.11	0.07	97.89
P56	2016-12-30	1	84	160	52	20.3	68*10	34	0	4	0	7.43	41.1	74.1	0	0	0	0	0	0	0	0	0			0.36	5.5	0.29	0.11	3.44	0.05	106
P57	2017-01-16	0	75	165	65	23.9	10*3	1.5	0	20	0	7.41	40.9	96.8	1	1	0	0	0	0	0	0	0	64	62	0.2	2.4	1.06	0.1	4.49	0.05	76.38
P58	2017-01-05	1	82	168	60	21.3	40*20	40	2	20	1	7.43	45	79.2	1	1	0	0	0	1	0	0	0	41	32	0.16	1.2	13.9	1.04	7.63	0.34	173.2
P59	2017-01-19	1	66	161	41	0.158	30*40	60	1	10	0	7.42	36	71	0	0	0	0	0	0	0	0	0	26	14	0	0	0.87	0.2	3.92	0.04	106
P60	2017-01-24	0	86	150	49	21.8	0	0	0	0.01	0				1	0	0	1	0	0	0	0	0			0.03	0.3	0.66	0.64	3.5	0.21	428
P61	2017-01-26	1	88	167	69	24.7	10*10	5	1	3					0	0	0	0	1	0	0	0	0	60.37	69.4	0.03	0.9	1.47	0.17	3.97	0.15	466
P62	2017-01-26	1	51	175	64	20.9	30*20	30	0	30	0	7.44	42.7	61.7	0	0	0	0	0	0	0	0	0	36	25	0.01	0.3	2.5	0.1	2.73	0.13	129
P63	2017-02-04	1	70	172	55	18.6	50*20	50	0	30	1	7.42	38	56	1	0	0	0	0	0	0	0	0	50	28.1	0.41	4.7	0.44	0.35	3.64		473.3
P64	2017-02-05	1	64	165	58	21.3	40*30	60	0	10	1	7.34	56	42	1	0	0	0	0	0	0	0	0	42	36	0	0		0.29	6.18	0.22	317
P65	2017-02-05	1	73	170	68	23.5	0	0	0	17	0	7.4	41.9	142.7	0	0	0	0	0	0	0	0	0	46	50	0	0		0.1	3.68	0.02	124.5
P66	2017-02-09	1	85	160	54	21.1	40*10	20	0	13	0	7.34	46.5	103.4	1	1	0	1	0	0	1	0	0	47	41	0	0	1.18	0.47	4.17	0.29	1118
P67	2017-02-09	1	60	163	68	25.6	20*10	10	0	20	1	7.41	52.7	97.6	0	0	0	0	0	0	0	0	0			0	0		0.08	4.53		131.1
P68	2017-02-07	1	76	166	65	23.6	60*20	60	0	16					1	0	0	0	0	1	0	0	1	47	48	0.06	1.1		0.19	3.44	0.02	43
P69	2017-02-14	1	61	172	67	22.6	40*20	40	1	20	0	7.46	32	77	1	0	0	0	0	0	0	0	0	46	35	0.02	0.2	0.22	0.13	3.36	0.02	62.72
P70	2017-02-16	1	65	170	53	18.3	40*30	60	1	20	1	7.39	65	53	0	0	0	0	0	0	0	0	0	48.51	31.3	0.01	0.1	1.29	0.13	4.07		66.54
P71	2017-02-16	0	71	156	65	26.7	0	0	0	0.08	0	7.41	36.7	80.7	1	1	0	0	1	1	0	0	0	62	61	0.33	3.7		0.06	3.19	0.03	141.2
P72	2017-02-17	1	82	182	59	17.8	60*30	75	0	40	0	7.4	43.1	100.5	0	0	0	0	1	0	0	0	0	38	24	0.1	2.1	0.14	0.15	3.41	0.04	75.48
P73	2017-02-01	1	85	165	41	15.1	30*30	45	1	8	1	7.42	43	55	1	0	0	1	0	0	0	0	0			0.01	0.1	0.98	0.34	3.82	0.09	1177
P74	2017-02-14	1	84	180	81	25	23*20	23	3	12					0	1	0	1	0	0	0	0	0	50	34	0	0		0.35	5.43	0.02	1212
P76	2017-03-07	1	59	171	70	23.9	30*20	30	0	15	0	7.48	40	60.8	1	0	0	0	0	0	0	0	0	54.5	41.2	0.09	0.7	14	0.08	5.79	0.11	94
P78	2017-03-08	1	78	165	64	23.5	60*27	81	0	30	0	7.39	47.5	61.1	1	0	0	0	0	0	0	0	0	52	41	0.03	0.2	0.81	0.16	4.01		56.27
P79	2017-03-11	1	65	170	54	18.7	40*20	40	0	4	1	7.38	74.6	38.8	0	0	0	0	0	0	0	0	0	43	36	0.01	0.2		0.21	3.87	1	194
P80	2017-02-28	1	73	162	57	21.7	0	0	0	5					0	0	0	0	0	0	0	0	0	49	62	0.13	3.6			2.69		79.01
P81	2017-03-18	1	66	165	64	23.5	50*50	125	0	1	0	7.42	42.4	79.1	0	0	0	0	0	1	0	0	0	48	57	0.16	4.5	0.1	0.06	2.98		136.5
P82	2017-03-10	1	79	165	79	29	50*40	100	0	10	0	7.38	42.1	71.1	1	1	0	0	0	1	1	0	0	56.46	42.8	0.16	1.6	1.01	0.18	3.02	0.04	207.6
P83	2017-03-09	1	67	169	74	25.9	40*40	80	0	3	1	7.38	44.1	58.5	0	0	0	0	0	0	0	0	0	47	57	0.13	2.6	0.35	0.11	3.25		23.47
P84	2017-03-21	1	82	170	82	28.4	30*20	30	0	5	1	7.46	43	53	1	0	0	0	0	0	0	0	0			0.13	1.4	1.36	0.04	3.97	0.03	70
P86	2017-03-23	1	71	172	77	26	40*45	100	0	10	0	7.42	45.2	66.8	0	0	0	0	0	0	0	0	0	52	53	0.55	7.1	0.49	0.28	3.37		27.02
P87	2017-03-25	1	70	170	50	20.4	40*35	70	0	10	0	7.43	44.9	69.6	0	0	0	0	0	0	0	0	0	38	31	0	0	2.89	0.11	5.75		75.92
P88	2017-03-25	1	81	157	70	28.4	0	0	0	2					0	1	0	1	1	0	1	0	0	62	53	0.08	2	0.15	0.49	2.2		875.1
P89	2017-03-24	1	75	176	70	22.6	40*10	20	1	3	0	7.42	41.8	68.1	1	0	0	1	0	0	0	1	0	60	46	0.11	1.8	0.46	0.78	3.45	0.05	177
P90	2017-04-05	1	59	169	66	23.1	47*40	94	0	10	1	7.41	47.8	45.6	0	0	0	0	0	0	1	0	0	34	25	0.04	1.3		0.2	3.01	0.03
P91	2017-04-11	1	78	174	65	21.5	50*30	75	1	6	0	7.41	39.1	88.1	0	0	0	0	0	0	0	0	0	51	43	0.16	3.1	1.81	0.13	5.38		98.86
P92	2017-04-10	1	81	170	50	17.3	10*20	10	1	20	0	7.43	47.7	66.8	0	0	0	0	0	0	0	0	0			0.17	1.6		0.22	2.87	0.05	975.4
P98	2017-08-03	1	77	174	77	25.4	50*15	37.5	0	10	1	7.45	36.9	59.1	1	0	0	1	1	1	0	0	0	71	78	0	0		0.3	8.03	0.46	883.7
P99	2017-08-24	1	71	178	48	15.1	40*40	80	2	17	0	7.4	48.4	88.8	0	1	1	0	0	0	0	1	0	56	43	0.07	1.2	0.28	0.74	2.19	0.03	51.56
P100	2017-08-25	1	84	165	69	25.3	20*20	20	4	20	1	7.43	43.4	60.4	1	0	0	1	0	1	0	0	0			0.11	1.1	9.1	0.18	4.47		270
P101	2017-08-29	1	85	165	35	12.8	30*30	45	2	9	1	7.34	50	74	1	0	0	1	0	0	0	0	0			0.01	0.2	1.92	0.27	4.32	0.09	515
P102	2017-08-30	1	67	161	41	15.8	30*40	60	1	10	0	7.39	42.6	77.3	0	0	0	0	0	0	0	0	0	31	15	0	0	1.19	0.1	4.15	0.19	644.3
P103	2017-09-01	1	81	169	57.5	20.1	60*20	60	0	0.08	0	7.42	39.2	60.8	1	0	0	1	1	0	0	0	0	66	47	0.21	2.4	0.37	0.12	2.43	0.04	201.2
P104	2017-09-14	1	81	175	80	26.1	0	0	1	4	0	7.45	38.8	67.4	1	1	0	1	0	0	0	0	0	61.7	90.3	0.05	0.6	8.38	0.42	4.5	0.04	543.3
P105	2017-09-16	0	76	158			4*20	4	0	20	1	7.45	72.1	54.6	0	1	1	0	0	1	0	0	0			0.05	1.1	0.35	0.95	2.04	0.26	11457
P106	2017-10-19	1	69	169	60		20*50	50	0	10	0	7.47	38.7	92.8	0	1	0	1	0	0	0	0	0	36	26	0.14	1.4		0.24	6.91	0.08	63
P107	2017-10-27	1	71	166	59		?*50		1	10	1	7.48	34.7	53.5	1	1	0	1	1	0	0	0	0			0.04	0.3	8.62	0.31	6.45	0.06	466
P108	2017-11-30	1	63	157	68		20*40	40	0	10	0	7.42	45.8	79.3	1	0	0	0	0	0	0	0	0	56	31	0.09	1.7	0.14	0.09	2.06		133
P110	2017-12-28	1	76	173	64		20*40	40	0	30	1	7.34	61.8	50.2	1	0	0	0	0	0	0	0	0	30	22	0	0	2.51	0.13	4.51	0.39	864
P111	2018-01-05	1	65	165	65		0	0	1	20	1	7.39	69	94	0	0	1	0	0	0	0	0	0	34	20	0	0		0.41	3.22		372
P112	2018-01-09	1	78	165	62		60*27	81	1	30	0	7.45	39.7	88.5	1	0	0	0	0	0	0	0	0			0.01	0.1	4.49	0.13	4.23	0.07	46.53
P113	2018-01-10	1	80	165	80		10*30	15	0	20	0	7.45	29.6	68.4	1	0	0	0	0	0	1	0	0	48	48	0	0	2.27	0.33	3.46	0.13	388
P114	2018-01-18	0	63	154	45		10*50	25	0	5	1	7.36	57.4	42.9	1	0	0	0	0	0	0	0	0			0.03	0.7	0.45	0.81	2.45		5667
P115	2018-01-10	1	69	170	71		40*50	100	0	20	1	7.38	55.7	52.2	1	0	1	1	1	0	0	0	0	59.62	25.1	0	0		1.73	2.54	0.52	9828
P116	2018-01-19	1	68	171	71		40*40	80	0	2	0	7.42	36.2	64.6	1	0	0	0	0	0	0	0	0	55.85	55.6	0.04	0.3	5.63	0.2	4.7	0.04	122
P117	2018-01-24	1	63	156	49		30*40	60	0	10	1	7.36	55.1	70	1	0	0	1	0	0	0	0	0	36.53	25.4	0.02	0.2	13.4	0.18	7.69		81.17
P118	2018-01-30	1	80	163	59		10*50	25	0	5	0	7.42	41.3	66.3	1	0	0	0	0	0	0	0	0	52	56	0.11	2	0.34	0.19	3.06	0.06	25.71
P119	2018-02-06	1	80	168	85		20*60	60	0	2					1	1	0	0	0	0	0	0	0	61	62	0.33	4.3		0.24	3.3		174
P120	2018-03-22	0	75	160	61		0	0	0	2	1	7.42	37.4	58.9	0	1	0	0	0	1	0	0	0	81.07	74.8	0.09	1.9	0.38	0.15	3.55	0.05	792
