# Supplementary material for: Serum docosahexaenoic acid as a predictor of hospital readmission in chronic obstructive pulmonary disease exacerbation: a retrospective cohort study
Source: PeerJ. 2026 Feb 19;14:e20865. doi: 10.7717/peerj.20865 (PMC12925419; doi:10.7717/peerj.20865)
Supplement: Supplemental Information 4 [file peerj-14-20865-s004.xlsx]

## Sheet: Sheet1
Variable name	Description	Code	Label/Meaning
sex	Biological sex of participant	0 / 1	0 = Female; 1 = Male
respiratory failure	Whether the patient had respiratory failure	0 / 1	0 = No; 1 = Yes
hypertension	History of hypertension	0 / 1	0 = No; 1 = Yes
Coronary heart disease	History of coronary heart disease (CHD)	0 / 1	0 = No; 1 = Yes
heart failure	History of heart failure	0 / 1	0 = No; 1 = Yes
Arrhythmias	History of arrhythmias	0 / 1	0 = No; 1 = Yes
Peripheral vascular disease	History of peripheral vascular disease	0 / 1	0 = No; 1 = Yes
diabetes	History of diabetes mellitus	0 / 1	0 = No; 1 = Yes
Hyperlipidemia	History of hyperlipidemia	0 / 1	0 = No; 1 = Yes
lung cancer	History of lung cancer	0 / 1	0 = No; 1 = Yes
osteoporosis	History of osteoporosis	0 / 1	0 = No; 1 = Yes
